# Supplementary material for: Radio Frequency Detection and Characterization of Water-Ethanol Solution through Spiral-Coupled Passive Micro-Resonator Sensor
Source: PubMed Central journal article supplement (PMC5948501; doi:10.3390/s18041075), 2018-04-03
Supplement: sensors-18-01075-s001.pdf [file sensors-18-01075-s001.pdf]

*Supplementary Material*

# Radio Frequency Detection and Characterization of Water-Ethanol Solution through Spiral-Coupled Passive Micro-Resonator Sensor

Gyan Raj Koirala <sup>1</sup>, Rajendra Dhakal <sup>1,2</sup>, Eun-Seong Kim <sup>1</sup>, Zhao Yao <sup>1</sup> and Nam-Young Kim <sup>1,\*</sup>

<sup>1</sup> RFIC Lab, Department of Electronic Engineering, Kwangwoon University, 01897, Seoul, South Korea; thegrkairala@gmail.com (G.R.K.); 3037eskim@gmail.com (E.-S.K.); yao9074@hotmail.com (Z.Y.)

<sup>2</sup> Department of Computer Science and Engineering, Sejong University, 05006, Seoul, South Korea; rajendra@sejong.ac.kr

\* Correspondence: nykim@kw.ac.kr

Received: 9 February 2018; Accepted: 31 March 2018; Published: 3 April 2018

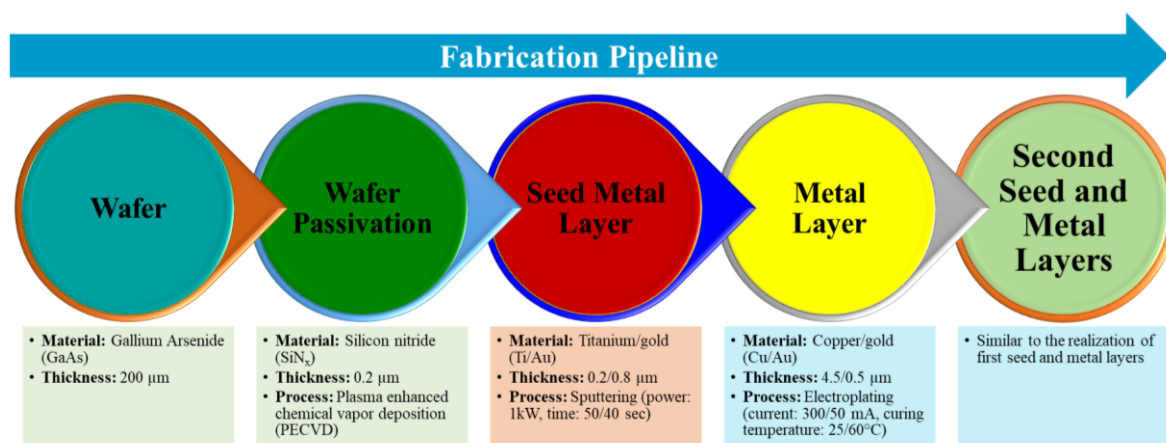

**Figure S1.** Passive microresonator sensor fabrication. Realization of the passive microresonator sensor using home-developed IPD fabrication processing.

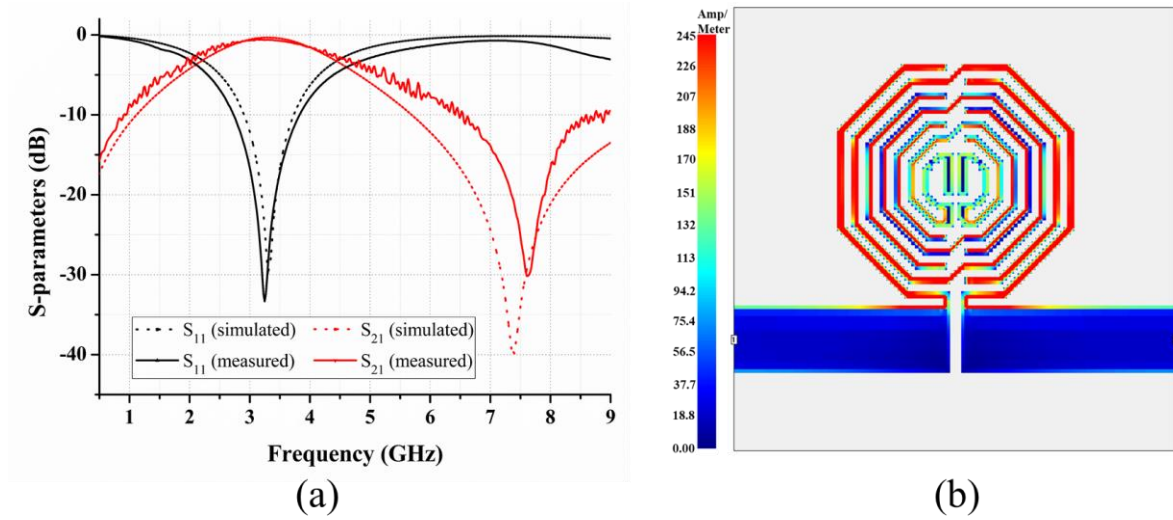

**Figure S2.** Performance of the bare sensor. (a) Comparison between the simulated and measured scattering parameters, and (b) distribution of the current source density at a simulated resonance frequency of 3.3 GHz.

**Table S1.** Measured resonance frequencies (in GHz) and corresponding rejection levels (in dB) for three different iterations.

|       | Iteration 1 |                 | Iteration 2 |                 | Iteration 3 |                 | Mean $\pm$ SE    |                   |
|-------|-------------|-----------------|-------------|-----------------|-------------|-----------------|------------------|-------------------|
|       | RF          | S <sub>11</sub> | RF          | S <sub>11</sub> | RF          | S <sub>11</sub> | RF               | S <sub>11</sub>   |
| DI    |             |                 |             |                 |             |                 |                  |                   |
| Water | 1.16        | -27.44          | 1.16        | -29.74          | 1.14        | -26.08          | 1.15 $\pm$ 0.006 | -27.75 $\pm$ 1.06 |
| 5%    | 1.21        | -22.32          | 1.23        | -23.78          | 1.25        | -22.80          | 1.23 $\pm$ 0.010 | -22.96 $\pm$ 0.43 |
| 10%   | 1.31        | -26.20          | 1.29        | -25.04          | 1.27        | -24.36          | 1.29 $\pm$ 0.010 | -25.20 $\pm$ 0.53 |
| 20%   | 1.36        | -23.40          | 1.36        | -22.62          | 1.38        | -22.16          | 1.37 $\pm$ 0.006 | -22.73 $\pm$ 0.36 |
| 30%   | 1.50        | -20.92          | 1.48        | -21.10          | 1.51        | -18.20          | 1.50 $\pm$ 0.008 | -20.07 $\pm$ 0.94 |
| 40%   | 1.57        | -16.91          | 1.59        | -17.02          | 1.60        | -16.35          | 1.59 $\pm$ 0.008 | -16.76 $\pm$ 0.20 |
| 50%   | 1.72        | -13.70          | 1.68        | -14.81          | 1.70        | -13.46          | 1.70 $\pm$ 0.010 | -13.99 $\pm$ 0.41 |

DI: deionized; RF: resonance frequency; Mean  $\pm$  SE: Mean  $\pm$  Standard Error

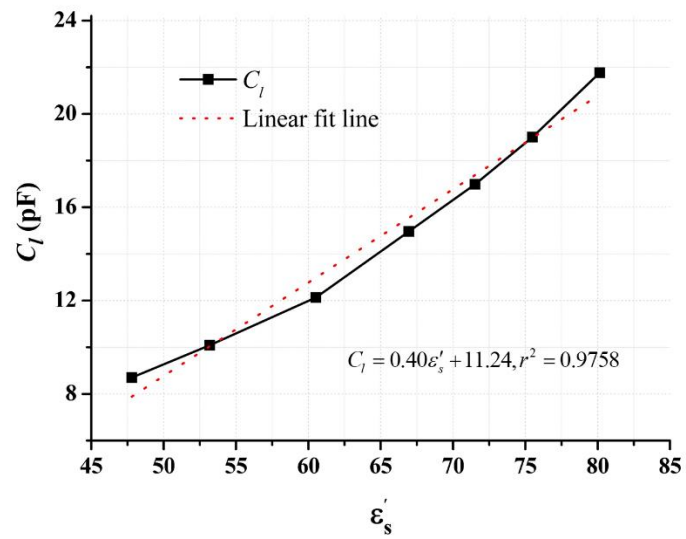

**Figure S3.** Loaded capacitance versus relative permittivity. Relationship between the computed values of the gap capacitance ( $C_l$ ) and the relative permittivity ( $\epsilon'_s$ ) of the solution.
